# Supplementary material for: Characteristics, main sources, health risks of PM 2.5 -bound perfluoroalkyl acids in Zhengzhou, central China: From seasonal variation perspective
Source: Copernicus journal article supplement (doi:10.5194/egusphere-2024-4147), 2025-01-31
Supplement: Supplementary file 1 [file egusphere-2024-4147-supplement.pdf]

1 **Characteristics, main sources, health risks of PM<sub>2.5</sub>-bound**  
2 **perfluoroalkyl acids in Zhengzhou, central China: From**  
3 **seasonal variation perspective**

4 **Jingshen Zhang<sup>1,3</sup>, Xibin Ma<sup>2</sup>, Minzhen Li<sup>2</sup>, Zichen Wang<sup>2</sup>, Nan Jiang<sup>2,1</sup>,**  
5 **Fengchang Wu<sup>3,4</sup>**

6 <sup>1</sup>College of Chemistry, Zhengzhou University, Zhengzhou 450001, China

7 <sup>2</sup>College of Ecology and Environment, Zhengzhou University, Zhengzhou  
8 450001, China

9 <sup>3</sup>Huang Huai Laboratory, Henan Academy of Sciences, Zhengzhou 450046,  
10 China

11 <sup>4</sup>State Key Laboratory of Environmental Criteria and Risk Assessment, Chinese  
12 Research Academy of Environmental Sciences, Beijing 100012, China

13 *Correspondence to:* Nan Jiang (jiangn@zzu.edu.cn), Xibin Ma  
14 (maxibin163@163.com)

15

# 16 **1. Experiment**

## 17 1.1 Samples Analysis

### 18 1.1.1 Samples Pretreatment

19 1): Quartz filters were cut into small pieces and placed into 50 mL  
20 polypropylene (PP) centrifuge tubes. An internal standard mixture solution of 50  
21  $\mu\text{L}$  at  $0.2 \mu\text{g/mL}$  was added to the cut filters.

22 2): Organic solvents (methanol, HPLC grade) were added to extract  
23 perfluoroalkyl acids from the samples via ultrasonic extraction. The ultrasonic  
24 extraction process was conducted in three stages. Initially, 4 mL of methanol was  
25 added and the samples were sonicated for 20 minutes; subsequently, 3 mL of  
26 methanol was added for another 20 minutes of sonication; finally, an additional 3  
27 mL of methanol was added for a 10-minute extraction. The extracts from each  
28 sonication were collected separately.

29 3): The extracts were diluted with ultrapure water to a total volume of 250 mL  
30 and then centrifuged (4500 r/min for 15 minutes) to obtain the clear supernatant.

31 4): The clear supernatant was enriched using a solid-phase extraction (SPE)  
32 instrument with a wax SPE column (6 mL, 150 mg). The first step involved  
33 conditioning the column with 4 mL of 0.1% aqueous ammonia-methanol solution,  
34 followed by 4 mL of methanol and 4 mL of ultrapure water; the second step was  
35 loading the 250 mL supernatant onto the wax SPE column at a flow rate of 1-2  
36 drops per second; the third step involved washing with 4 mL of 25 mM ammonium  
37 acetate solution (pH=4); the fourth step was drying under vacuum for 30 minutes  
38 using the SPE instrument; the fifth step was elution with 4 mL of methanol  
39 followed by 4 mL of 0.1% aqueous ammonia-methanol solution, and the eluate was  
40 collected in a 10 mL PP centrifuge tube to obtain 8 mL of the final eluate.

41 5): Nitrogen Evaporationoff was performed using a nitrogen evaporator to  
42 completely dry the eluate (the nitrogen blow temperature should not exceed 40°C,  
43 and no bubbles should be present on the liquid surface).

44 6): The dried eluate was reconstituted with 1 mL of methanol.

45 7): The reconstituted 1 mL solution was filtered through a 0.22 µm nylon  
46 syringe filter into a 2 mL brown sample vial for subsequent chromatographic  
47 analysis.

#### 48 1.1.2 Mass spectrometer condition

49 Chromatographic Column Selection: A C18 reverse-phase column (150 mm ×  
50 2.1 mm, 1.8 µm) was used. Chromatographic Conditions: Mobile phase A (2 mM  
51 ammonium acetate aqueous solution); Mobile phase B (acetonitrile); runtime of 20  
52 minutes; flow rate of 0.3 mL/min; column temperature of 40°C; injection volume of  
53 10 µL; gradient elution program (0–14 min 80% A, 14–16 min 10% A, 16–20 min  
54 80% A).

55 Mass Spectrometry Conditions: Electrospray ionization (ESI) source in  
56 negative ion mode. Detection mode: Multiple Reaction Monitoring (MRM). Curtain  
57 gas pressure at 35.0 psi; spray voltage at –4500 V; nebulizer temperature at 550°C;  
58 nebulizer gas pressure at 55 psi; auxiliary gas pressure at 60 psi.

#### 59 1.1.3 Material analysis

60 Qualitative Analysis: One precursor ion and two product ions were selected  
61 for monitoring the target compounds. Under the same experimental conditions, the  
62 absolute value of the relative deviation between the retention time of the target  
63 compound in the sample and that in the standard sample should be less than 2.5%;  
64 and the relative abundance of the qualitative product ions ( $K_{sam}$ ) of the target  
65 compound in the sample compared with the relative abundance of the  
66 corresponding qualitative product ions ( $K_{std}$ ) in a standard solution of similar

67 concentration should not exceed the specified range, thus confirming the presence  
68 of the corresponding target compound in the sample.

$$69 \quad K_{sam} = \frac{A_2}{A_1} \times 100\% \quad (1)$$

70 Where:

71  $K_{sam}$  is the relative abundance of the qualitative product ions of the target  
72 compound in the sample, %;

73  $A_2$  is the response value of the secondary mass spectrometry qualitative  
74 product ions of the target compound in the sample;

75  $A_1$  is the response value of the secondary mass spectrometry quantitative  
76 precursor ions of the target compound in the sample.

$$77 \quad K_{std} = \frac{A_{std2}}{A_{std1}} \times 100\% \quad (2)$$

78 Where:

79  $K_{std}$  is the relative abundance ratio of the qualitative product ions of the target  
80 compound in the standard sample, %;

81  $A_{std2}$  is the response value of the secondary mass spectrometry qualitative  
82 product ions of the target compound in the standard sample;

83  $A_{std1}$  is the response value of the secondary mass spectrometry quantitative  
84 precursor ions of the target compound in the standard sample.

| $K_{std}$ (%)          | $K_{sam}$ Tolerated Deviation (%) |
|------------------------|-----------------------------------|
| $K_{std} > 50$         | $\pm 20$                          |
| $20 < K_{std} \leq 50$ | $\pm 25$                          |
| $10 < K_{std} \leq 20$ | $\pm 30$                          |
| $K_{std} \leq 10$      | $\pm 50$                          |

85 The mass concentrations of 17 perfluoro compounds in the samples were  
86 calculated using the following formula:

$$87 \quad \rho_i = \frac{x_i \times m_{is}}{V_w} \quad (3)$$

88 Where:

89  $\rho_i$  is the mass concentration of the  $i$ th perfluoro compound in the sample;

90  $x_i$  is the concentration ratio of the  $i$ th perfluoro compound to the corresponding  
91 internal standard calculated from the calibration curve;

92  $m_{is}$  is the added mass of the internal standard corresponding to the  $i$ th  
93 perfluoro compound;

94  $V_w$  is the sample volume.

## 95 1.2 Source Apportionment

96 The PMF model, which is widely applied as a receptor model (Paatero, 1997;  
97 Paatero and Tapper, 1994), divides the sample data matrix into two (factor  
98 contribution (G) and feature profile (F)) to quantitatively identify the source of  
99 contaminants. The factor contributions and profiles were derived via the PMF model  
100 by minimizing the objective function Q.

101 The two matrices (factor contributions (G) and factor profiles (F)), as described  
102 in the following:

$$103 \quad X = G \times F + E \quad (4)$$

104 where X, the data matrix, is the  $n \times m$  matrix of the  $m$  measured chemical species  
105 in  $n$  samples; F is a  $p \times m$ -matrix with rows that represent the emission profiles of  $p$   
106 factors; and G, an  $n \times p$ -matrix with columns that represent the scores of  $p$  factors.  
107 Matrix E is the residual matrix.

108 Factor contributions and profiles were derived by the PMF model by minimizing  
109 the objective function Q, as described in the following:

$$110 \quad Q = \sum_{i=1}^n \sum_{j=1}^m \left[ \frac{e_{ij}}{u_{ij}} \right]^2 \quad (5)$$

111 where  $e_{ij}$  is the residual of the  $j$ th chemical component in the  $i$ th sample, and  $u_{ij}$  is  
112 the uncertainty of the  $j$ th chemical component in the  $i$ th sample.

113 According to the previous studies (Jiang et al., 2018), uncertainty is calculated as  
114 follows (Equation 6):

115

$$116 \quad u_{ij} = \begin{cases} 0.2 * c_{ij} + MDL/3 & u_{ij} \leq MLD \\ 0.1 * c_{ij} + MDL/3 & u_{ij} > MLD \end{cases} \quad (6)$$

117 where  $u_{ij}$  is the uncertainty of the  $j_{th}$  chemical component in the  $i_{th}$  sample,  $c_{ij}$  is  
118 the concentration of the  $j_{th}$  chemical component in the  $i_{th}$  sample. The missing data is  
119 instead by species median, and the outliers are excluded from the PMF analysis. More  
120 other details were described in the PMF 5.0 User Guide (Yu et al., 2009).

121 The chemical database used for the PMF consisted of PFAAs, PFBA, PFPeA,  
122 PFHxA, PFHpA, PFOA, PFNA, PFDA, PFUnDA, PFDoDA, PFTTrDA, PFTeDA,  
123 PFHxDA, PFOA, PFBS, PFHxS, PFOS, PFDS, giving a total of 22 species. In this  
124 study, the overall number of samples and the number of variables complies with the  
125 ratio of at least 3/1, as proposed by Belis et al (Belis et al., 2015).

126 All the included species were defined from weak to strong in the PMF based on  
127 their signal-to-noise ratio (S/N). The PM species were categorized as “bad” when the  
128 S/N ratio were below 0.2; “weak” when the S/N ratio were between 0.2 and 2; and  
129 “strong” when the S/N ratio were higher than 2 (Esmaeilirad et al., 2020). The bad  
130 species are excluded from the analysis while the uncertainty for the weak species is  
131 tripled. PFAAs was defined as a “total variable” and was automatically categorized as  
132 “weak”. All the included species were well reconstructed and were qualified as  
133 “strong”.

134 The program was run several times to find the smallest value of  $Q_{expect}$  and to  
135 reduce the observed value of residual error matrix E as much as possible in order to  
136 ensure that the simulation results show a good correlation with the observations. The  
137 stability of a PMF solution was estimated based on the bootstrap (BS), displacement  
138 (DISP), and BS-DISP results (US EPA., 2014). After running the program several  
139 times, the number of sources was set from two to six, and the results of four sources  
140 were selected due to their adequate fit to the measurement data and their physical

141 meaning (more details can be found in Table S2). When the DISP analysis results  
142 were 4 factors, no factor exchange occurred, indicating that the results were relatively  
143 stable. Each factor mapping of the 4 factor results of BS analysis is greater than 80%,  
144 indicating that the uncertainty of BS is acceptable and the number of factors is  
145 reasonable. The PMF results were constrained with dQrobust of 0.59% and Fpeak =  
146 0.0 produced the most physically reasonable source profiles.

### 147 1.3 Average Daily Inhalation (ADI) and Estimated Daily Intake (EDI)

#### 148 Calculation

149 Median concentrations were utilized for data analysis in lieu of mean values, a  
150 choice necessitated by the presence of extreme values (Huang et al., 2021).  
151 Reference-based methods were employed to calculate the EDI and annual exposure  
152 dosages (AEDs) for adults (Liu et al., 2017; Liu et al., 2023). The two calculations are  
153 as follows:

$$154 \text{ ADI} = \frac{\rho \times \text{IR} \times \text{EF} \times \text{ED}}{\text{BW} \times \text{AT}} \quad (7)$$

$$155 \text{ EDI} = \rho \times \text{IR} \quad (8)$$

$$156 \text{ AED} = \text{EDI} \times \text{EF} \times \text{DR} \quad (9)$$

157 where ADI is average daily inhalation ( $\text{pg} \cdot (\text{kg} \cdot \text{d})^{-1}$ ),  $\rho$  is the daily concentration  
158 of each PFAAs ( $\text{pg} \cdot \text{m}^{-3}$ ), IR is the adult inhalation rate ( $15.73 \text{ m}^3 \cdot \text{day}^{-1}$ ), EF is the  
159 annual exposure frequency ( $350 \text{ days} \cdot \text{year}^{-1}$ ), ED is burst time (72 a), BW is adult  
160 weight (65.0 kg), AT is average time ( $72 \text{ a} \cdot 365 \text{ d} \cdot \text{a}^{-1}$ ), EDI is estimated daily intake  
161 (pg), and DR is the detection rate of the compound.

162 **2. Tabulation**

163 Table. S1. PFAAs CIS and corresponding internal standard substance

| Compound                            | CAS        | Internal Standard                   | Mark recovery (%) | MDL (ng/L) | Retention time (min) |
|-------------------------------------|------------|-------------------------------------|-------------------|------------|----------------------|
| PFBA                                | 375-22-4   | <sup>13</sup> C <sub>4</sub> PFBA   | 97.49~112.02      | 0.3        | 2.7                  |
| PFPeA                               | 2706-90-3  | <sup>13</sup> C <sub>4</sub> PFBA   | 73.61~112.98      | 0.2        | 3.9                  |
| PFHxA                               | 307-24-4   | <sup>13</sup> C <sub>4</sub> PFHxA  | 94.84~115.89      | 0.2        | 5.1                  |
| PFHpA                               | 375-85-9   | <sup>13</sup> C <sub>4</sub> PFHxA  | 71.74~111.84      | 0.2        | 5.4                  |
| PFOA                                | 335-67-1   | <sup>13</sup> C <sub>4</sub> PFOA   | 91.04~117.75      | 0.3        | 6.1                  |
| PFNA                                | 375-95-1   | <sup>13</sup> C <sub>4</sub> PFNA   | 92.55~112.96      | 0.2        | 6.9                  |
| PFDA                                | 335-76-2   | <sup>13</sup> C <sub>4</sub> PFDA   | 96.81~115.60      | 0.2        | 7.5                  |
| PFUnDA                              | 2058-94-8  | <sup>13</sup> C <sub>4</sub> PFUnDA | 96.81~115.24      | 0.2        | 7.8                  |
| PFDoDA                              | 307-55-1   | <sup>13</sup> C <sub>2</sub> PFDoDA | 97.46~116.71      | 0.2        | 8.6                  |
| PFTTrDA                             | 72629-94-8 | <sup>13</sup> C <sub>2</sub> PFDoDA | 96.88~110.99      | 0.3        | 9.2                  |
| PFTeDA                              | 376-06-7   | <sup>13</sup> C <sub>2</sub> PFDoDA | 98.10~113.01      | 0.2        | 9.4                  |
| PFHxDA                              | 67905-19-5 | <sup>13</sup> C <sub>2</sub> PFDoDA | 99.38~118.08      | 0.3        | 10.2                 |
| PFODA                               | 16517-11-6 | <sup>13</sup> C <sub>2</sub> PFDoDA | 85.64~104.97      | 0.2        | 10.8                 |
| PFBS                                | 375-73-5   | <sup>18</sup> O <sub>2</sub> PFHxS  | 71.27~106.25      | 0.3        | 11.0                 |
| PFHxS                               | 355-46-4   | <sup>18</sup> O <sub>2</sub> PFHxS  | 89.91~102.78      | 0.3        | 11.8                 |
| PFOS                                | 1763-23-1  | <sup>13</sup> C <sub>4</sub> PFOS   | 96.42~111.07      | 0.3        | 13.2                 |
| PFDS                                | 335-77-3   | <sup>13</sup> C <sub>4</sub> PFOS   | 97.56~109.07      | 0.2        | 14.4                 |
| <sup>13</sup> C <sub>4</sub> PFBA   |            |                                     |                   |            | 2.7                  |
| <sup>13</sup> C <sub>4</sub> PFHxA  |            |                                     |                   |            | 5.1                  |
| <sup>13</sup> C <sub>4</sub> PFOA   |            |                                     |                   |            | 6.9                  |
| <sup>13</sup> C <sub>4</sub> PFNA   |            |                                     |                   |            | 7.5                  |
| <sup>13</sup> C <sub>4</sub> PFDA   |            |                                     |                   |            | 7.8                  |
| <sup>13</sup> C <sub>4</sub> PFUnDA |            |                                     |                   |            | 8.6                  |
| <sup>13</sup> C <sub>2</sub> PFDoDA |            |                                     |                   |            | 9.2                  |
| <sup>18</sup> O <sub>2</sub> PFHxS  |            |                                     |                   |            | 9.4                  |
| <sup>13</sup> C <sub>4</sub> PFOS   |            |                                     |                   |            | 10.2                 |



Table. S2. Summary of PMF and error estimation diagnostics from two to six factors.

| Factor number                           | PMF              |               |                  |                                  |                                                   |
|-----------------------------------------|------------------|---------------|------------------|----------------------------------|---------------------------------------------------|
|                                         | 2                | 3             | 4                | 5                                | 6                                                 |
| $Q_{\text{robust}}$                     | 15289            | 11948         | 11021            | 9936                             | 7941                                              |
| $Q_{\text{true}}$                       | 21987            | 16238         | 13123            | 11071                            | 9375                                              |
| $Q_{\text{expected}}$                   | 1480             | 1301          | 1219             | 1189                             | 1048                                              |
| $Q_{\text{true}}/Q_{\text{expected}}$   | 14.85608108      | 12.48117      | 10.76538         | 9.311186                         | 8.945611                                          |
| $Q_{\text{robust}}/Q_{\text{expected}}$ | 10.33040541      | 9.183705      | 9.041017         | 8.356602                         | 7.57729                                           |
| DISP%dQ                                 | 0                | 0             | 0                | 0                                | 0                                                 |
| DISP swaps                              | 0                | 0             | 0                | 0                                | 0                                                 |
| Factor with BS mapping < 80%            | All factor > 80% | factor 3, 47% | All factor > 80% | factor 3, 65%,<br>factor 4, 33%, | factor 1, 41%,<br>factor 5, 63%,<br>factor 6, 71% |

Table. S3. Atmospheric PM<sub>2.5</sub> sample information table

| Sampling time | Samples quantity | Sampling volume (m <sup>3</sup> ) | Membrane diameter (mm) | Sample type                                |
|---------------|------------------|-----------------------------------|------------------------|--------------------------------------------|
| Spring        | 15               | 3.25                              | 90                     | Urban atmospheric PM <sub>2.5</sub> sample |
| Summer        | 15               | 3.25                              | 90                     |                                            |
| Autumn        | 15               | 3.25                              | 90                     |                                            |
| Winter        | 15               | 3.25                              | 90                     |                                            |

### 3. Figure

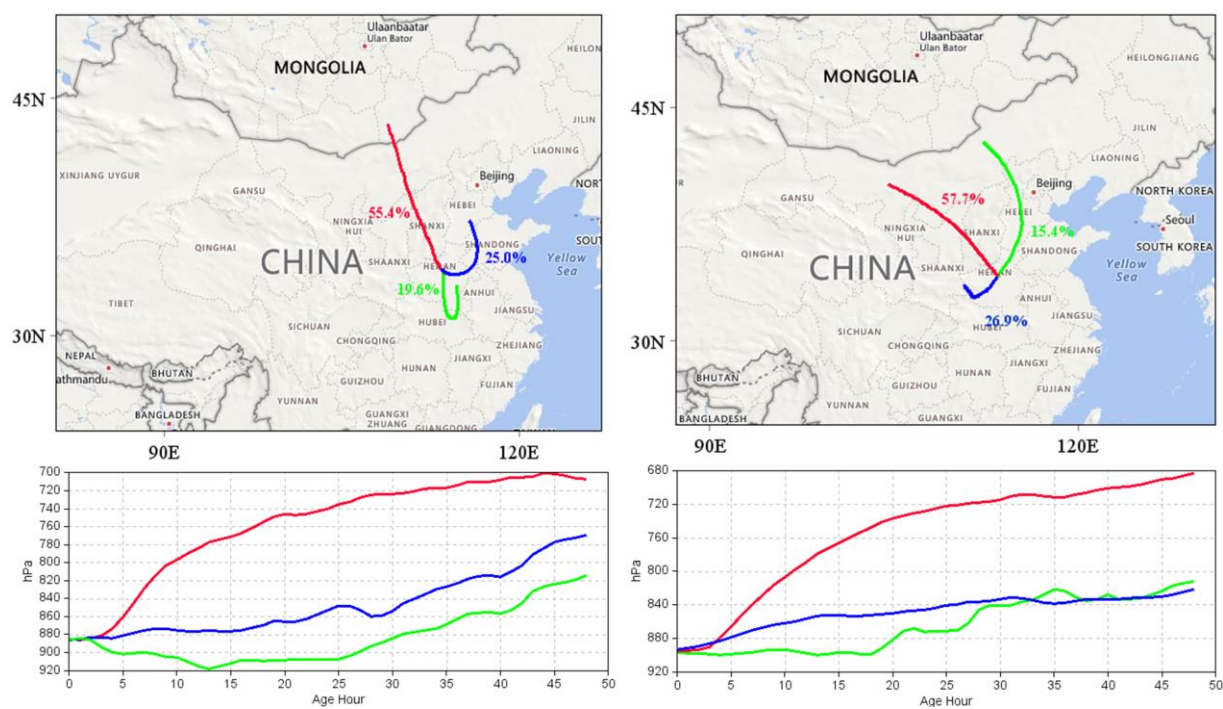

Fig. S1. Cluster analysis map of backward trajectories in Zhengzhou City (left and right are summer and autumn respectively, created by MeteInfoMap 3.5.11 (Wang, 2014; Wang, 2019)). © Microsoft. The software is open.

## References

- Belis, C.A., Karagulian, F., Amato, F., Almeida, M., Artaxo, P., Beddows, D.C.S., et al., 2015. A new methodology to assess the performance and uncertainty of source apportionment models II: The results of two European intercomparison exercises. *Atmos. Environ.* 123, 240-250. <http://dx.doi.org/10.1016/j.atmosenv.2015.10.068>
- Esmailirad, S., Lai, A., Abbaszade, G., Schnelle-Kreis, J., Zimmermann, R., Uzu, G., et al., 2020. Source apportionment of fine particulate matter in a Middle Eastern Metropolis, Tehran-Iran, using PMF with organic and inorganic markers. *Sci. Total. Environ.* 705. <http://dx.doi.org/10.1016/j.scitotenv.2019.135330>
- Huang, W., Shi, Y., Huang, J., Deng, C., Tang, S., Liu, X., et al., 2021. Occurrence of Substituted  $\rho$ -Phenylenediamine Antioxidants in Dusts. *Environ. Sci. Technol. Lett.* 8, 381-385. <http://dx.doi.org/10.1021/acs.estlett.1c00148>
- Jiang, N., Yin, S., Guo, Y., Li, J., Kang, P., Zhang, R., et al., 2018. Characteristics of mass concentration, chemical composition, source apportionment of PM<sub>2.5</sub> and PM<sub>10</sub> and health risk assessment in the emerging megacity in China. *Atmos. Pollut. Res.* 9, 309-321. <http://dx.doi.org/10.1016/j.apr.2017.07.005>
- Liu, J., Wang, Y., Le, P.-H., Shou, Y.-P., Li, T., Yang, M.-M., et al., 2017. Polycyclic Aromatic Hydrocarbons (PAHs) at High Mountain Site in North China: Concentration, Source and Health Risk Assessment. *Aerosol Air Qual. Res.* 17, 2867-2877. <http://dx.doi.org/10.4209/aaqr.2017.08.0288>
- Liu, L.-S., Guo, Y.-T., Wu, Q.-Z., Zeeshan, M., Qin, S.-J., Zeng, H.-X., et al., 2023. Per- and polyfluoroalkyl substances in ambient fine particulate matter in the Pearl River Delta, China: Levels, distribution and health implications. *Environ. Pollut.* 334. <http://dx.doi.org/10.1016/j.envpol.2023.122138>
- Paatero, P., 1997. Least squares formulation of robust non-negative factor analysis. *Chemometrics Intell. Lab. Syst.* 37, 23-35. [http://dx.doi.org/10.1016/s0169-7439\(96\)00044-5](http://dx.doi.org/10.1016/s0169-7439(96)00044-5)
- Paatero, P., Tapper, U., 1994. POSITIVE MATRIX FACTORIZATION - A NONNEGATIVE FACTOR MODEL WITH OPTIMAL UTILIZATION OF ERROR-ESTIMATES OF DATA VALUES. *Environmetrics.* 5, 111-126. <http://dx.doi.org/10.1002/env.3170050203>
- US EPA. Positive matrix factorization (PMF) 5.0 fundamentals and user guide [EB]. Office of Research and Development, Washington, DC, 2014.
- Wang, Y. Q., 2014. Meteolnfo: GIS software for meteorological data visualization and analysis. *Meteorol. Appl.* 21, 360-368. <https://doi.org/10.1002/met.1345>
- Wang, Y. Q., 2019. An Open Source Software Suite for Multi-Dimensional Meteorological Data Computation and Visualisation. *Journal of Open Research Software.* 7, 21. <https://doi.org/10.5334/jors.267>
- Yu, Y., Galle, B., Panday, A., Hodson, E., Prinn, R., Wang, S., 2009. Observations of high rates of NO<sub>2</sub>-HONO conversion in the nocturnal atmospheric boundary layer in Kathmandu, Nepal. *Atmos. Chem. Phys.* 9, 6401-6415. <http://dx.doi.org/10.5194/acp-9-6401-2009>
