# Supplementary material for: Characteristics, main sources, health risks of PM 2.5 -bound perfluoroalkyl acids in Zhengzhou, central China: From seasonal variation perspective
Source: Copernicus journal article supplement (doi:10.5194/egusphere-2024-4147), 2025-01-31
Supplement: Supplementary file [file egusphere-2024-4147-AC2-supplement.pdf]

1    **Itemized Response to Reviewer's Comments**

2    **Ms. Ref. No.:** egusphere-2024-4147

3    **Title:** Characteristics, main sources, health risks of PM<sub>2.5</sub>-bound perfluoroalkyl acids  
4    in Zhengzhou, central China: From seasonal variation perspective

5    **RESPONSE TO REVIEWERS**

6    **Reviewer Comments:**

7    **RESPONSE:** We sincerely thank the valuable and constructive inputs of the reviewer  
8    on our manuscript. We believe that we have adequately addressed all comments and  
9    thus the current version has been greatly improved with those valuable comments. In  
10   the revised manuscript, all the modifications were highlighted in red.

11

**General comments:**

The manuscript presents a study on PM<sub>2.5</sub>-bound perfluoroalkyl acids (PFAAs) in Zhengzhou, China, focusing on seasonal variations, source apportionment using positive matrix factorization (PMF), and health risk assessment. The study is relevant and contributes to understanding PFAS contamination in urban air. The manuscript is well-structured and logically organised. However, it contains several typographical and grammatical errors. While some of these have been highlighted in the ‘technical corrections’ section, the list is not exhaustive. A thorough proofreading is recommended to enhance clarity and readability.

Response: Thank you for your valuable and constructive comments. Detailed revisions have been listed below.

**Specific comments:**

**Comment 1:** L.38 – Please change the expansion of PFAS to per- and polyfluoroalkyl substances from perfluoroalkyl substances.

Response: This sentence has been rephrased.

Lines 37 – 41 (New Version): Perfluoroalkyl Acids (PFAAs), a subset of per- and polyfluoroalkyl substances (PFASs), can form smooth surfaces that are waterproof, oil-resistant, and stain-resistant, hence their widespread application in various industrial productions, such as paints, surfactants, coatings, emulsifiers, and fire retardants (Lindstrom et al., 2011).

**Reference:**

Lindstrom, A.B., Strynar, M.J., Libelo, E.L., 2011. Polyfluorinated Compounds: Past, Present, and Future. Environ. Sci. Technol. 45, 7954-7961. <http://dx.doi.org/10.1021/es2011622>

**Comment 2:** Section 2.1 – The use of quartz fiber filters during PM sampling is known to produce positive sampling artefacts such as the adsorption of gas phase compounds onto the filter. For further details on such artefacts, refer to Turpin et al. (1994) ([https://doi.org/10.1016/1352-2310\(94\)00133-6](https://doi.org/10.1016/1352-2310(94)00133-6)) and Chang et al. (2024) (<https://doi.org/10.1039/D4EM00359D>). PFAS such as PFOA are known to partition out into gas phase from the aerosols (please see studies by Ahrens et al. 2012 (<https://doi.org/10.1021/es300898s>) and McMurdo et al. 2008

(<https://doi.org/10.1021/es7032026>). Additionally, short-chain PFAS, including PFBA and PFBS, are semi-volatile and may exist in both the gaseous and particulate phases. As a result, the PFAA concentrations measured in this study may be slightly overestimated due to the potential inclusion of gaseous PFAA. Consider addressing these sampling artifacts in the methodology section.

Response: We sincerely appreciate the reviewer for highlighting this comment. It should be noted that the positive sampling artefacts raised by reviewer is existent. However, there is still a lack of effective methods for PFAA sampling in particulate matter and the quartz fiber filters were also widely to sample particulate matter in previous researches (Fang et al., 2019; Wu et al., 2019 and Li et al., 2024). Before sampling, quartz filters could be baked to remove disturb from organic matter. In process blanks of this study, PFAA levels were below the method detection limits (MDLs). Considering that the increased airflow during pump operation enhances the adsorption of gaseous PFAA on quartz filters, this study illustrated in the Results and Discussion section that the adsorption effect of quartz filters may lead to a slight overestimated of PFAA concentrations.

Lines 194 – 197 (New Version): However, the increased airflow during pump operation enhanced the adsorption of gaseous PFAA on quartz filters (Turpin et al., 1994; McMurdo et al., 2008; Ahrens et al., 2012; Chang et al., 2024), which may lead to a slight overestimated of PFAA values in this study.

#### Reference:

- Ahrens, L., Harner, T., Shoeib, M., Lane, D.A., Murphy, J.G., 2012. Improved Characterization of Gas-Particle Partitioning for Per- and Polyfluoroalkyl Substances in the Atmosphere Using Annular Diffusion Denuder Samplers. *Environ. Sci. Technol.* 46, 7199-7206. <http://dx.doi.org/10.1021/es300898s>
- Chang, N.Y., Eichler, C.M.A., Amparo, D.E., Zhou, J., Baumann, K., Hubal, E.A.C., et al., 2024. Indoor air concentrations of PM<sub>2.5</sub> quartz fiber filter-collected ionic PFAS and emissions to outdoor air: findings from the IPA campaign. *Environ. Sci.-Process Impacts*. <http://dx.doi.org/10.1039/d4em00359d>
- Fang, S., Li, C., Zhu, L., Yin, H., Yang, Y., Ye, Z., et al., 2019. Spatiotemporal distribution and isomer profiles of perfluoroalkyl acids in airborne particulate matter in Chengdu City, China. *Sci. Total. Environ.* 689, 1235-1243. <http://dx.doi.org/10.1016/j.scitotenv.2019.06.498>
- Li, X., Wang, Y., Cui, J., Shi, Y., Cai, Y., 2024. Occurrence and Fate of Per- and Polyfluoroalkyl Substances (PFAS) in Atmosphere: Size-Dependent Gas-Particle Partitioning, Precipitation

Scavenging, and Amplification. Environ. Sci. Technol. 58, 9283-9291.  
<http://dx.doi.org/10.1021/acs.est.4c00569>

McMurdo, C.J., Ellis, D.A., Webster, E., Butler, J., Christensen, R.D., Reid, L.K., 2008. Aerosol enrichment of the surfactant PFO and mediation of the water - Air transport of gaseous PFOA. Environ. Sci. Technol. 42, 3969-3974. <http://dx.doi.org/10.1021/es7032026>

Turpin, B.J., Huntzicker, J.J., Hering, S.V., 1994. Investigation of organic aerosol sampling artifacts in the los angeles basin. Atmos. Environ. 28, 3061-3071. [http://dx.doi.org/10.1016/1352-2310\(94\)00133-6](http://dx.doi.org/10.1016/1352-2310(94)00133-6)

Wu, J., Jin, H., Li, L., Zhai, Z., Martin, W., Hu, J., et al., 2019. Atmospheric perfluoroalkyl acid occurrence and isomer profiles in Beijing, China. Environ. Pollut. 225. <http://dx.doi.org/10.1016/j.envpol.2019.113129>

**Comment 3:** L.126-130 – The sentences are not clear. Please rephrase.

**Response:** The sentences have been rephrased.

Lines 124 – 133 (New Version): Before sampling, quartz filters were wrapped in aluminum foil and baked in a muffle furnace at 450°C for 5 hours to eliminate organic components. They were then placed in a super clean room (temperature of 20 ± 5°C; relative humidity of 50 ± 5%) for 48 hours. Clean the instrument with alcohol cotton before and after each sampling and record the standard state volume of the sampler. Quartz filters were weighed twice before and after sampling respectively, and the error between the two weighing was not more than 10 mg. After weighing the quartz filter, the quartz filter was wrapped in aluminum foil and stored at –18 ° C. The above experimental processes were carried out in the ultra-clean room.

**Comment 4:** Section 2.2 – Please provide more information on the product details of the PFAA and mass labelled PFAA mix.

**Response:** More information of the PFAA and mass labelled PFAA mix has been supplemented in Supplementary Table. S1 and S2.

**Table. S1. PFAAs CAS and corresponding internal standard substance**

| Compound | CAS       | Internal Standard                  | Relative Molecular Mass | Retention time (min) |
|----------|-----------|------------------------------------|-------------------------|----------------------|
| PFBA     | 375-22-4  | <sup>13</sup> C <sub>4</sub> PFBA  | 214.04                  | 2.7                  |
| PFPeA    | 2706-90-3 | <sup>13</sup> C <sub>4</sub> PFBA  | 264.05                  | 3.9                  |
| PFHxA    | 307-24-4  | <sup>13</sup> C <sub>4</sub> PFHxA | 314.06                  | 5.1                  |
| PFHpA    | 375-85-9  | <sup>13</sup> C <sub>4</sub> PFHxA | 364.07                  | 5.4                  |

| Compound                            | CAS        | Internal<br>Standard                | Relative<br>Molecular<br>Mass | Retention<br>time (min) |
|-------------------------------------|------------|-------------------------------------|-------------------------------|-------------------------|
| PFOA                                | 335-67-1   | <sup>13</sup> C <sub>4</sub> PFOA   | 414.08                        | 6.1                     |
| PFNA                                | 375-95-1   | <sup>13</sup> C <sub>4</sub> PFNA   | 464.09                        | 6.9                     |
| PFDA                                | 335-76-2   | <sup>13</sup> C <sub>4</sub> PFDA   | 514.10                        | 7.5                     |
| PFUnDA                              | 2058-94-8  | <sup>13</sup> C <sub>4</sub> PFUnDA | 564.11                        | 7.8                     |
| PFDoDA                              | 307-55-1   | <sup>13</sup> C <sub>2</sub> PFDoDA | 614.12                        | 8.6                     |
| PFTTrDA                             | 72629-94-8 | <sup>13</sup> C <sub>2</sub> PFDoDA | 664.13                        | 9.2                     |
| PFTeDA                              | 376-06-7   | <sup>13</sup> C <sub>2</sub> PFDoDA | 714.14                        | 9.4                     |
| PFHxDA                              | 67905-19-5 | <sup>13</sup> C <sub>2</sub> PFDoDA | 814.16                        | 10.2                    |
| PFODA                               | 16517-11-6 | <sup>13</sup> C <sub>2</sub> PFDoDA | 914.18                        | 10.8                    |
| PFBS                                | 375-73-5   | <sup>18</sup> O <sub>2</sub> PFHxS  | 300.11                        | 11.0                    |
| PFHxS                               | 355-46-4   | <sup>18</sup> O <sub>2</sub> PFHxS  | 400.14                        | 11.8                    |
| PFOS                                | 1763-23-1  | <sup>13</sup> C <sub>4</sub> PFOS   | 500.16                        | 13.2                    |
| PFDS                                | 335-77-3   | <sup>13</sup> C <sub>4</sub> PFOS   | 600.18                        | 14.4                    |
| <sup>13</sup> C <sub>4</sub> PFBA   |            |                                     | 226.04                        | 2.7                     |
| <sup>13</sup> C <sub>4</sub> PFHxA  |            |                                     | 326.04                        | 5.1                     |
| <sup>13</sup> C <sub>4</sub> PFOA   |            |                                     | 426.05                        | 6.9                     |
| <sup>13</sup> C <sub>4</sub> PFNA   |            |                                     | 476.06                        | 7.5                     |
| <sup>13</sup> C <sub>4</sub> PFDA   |            |                                     | 526.07                        | 7.8                     |
| <sup>13</sup> C <sub>4</sub> PFUnDA |            |                                     | 576.08                        | 8.6                     |
| <sup>13</sup> C <sub>2</sub> PFDoDA |            |                                     | 626.09                        | 9.2                     |
| <sup>18</sup> O <sub>2</sub> PFHxS  |            |                                     | 402.10                        | 9.4                     |
| <sup>13</sup> C <sub>4</sub> PFOS   |            |                                     | 526.08                        | 10.2                    |

Table. S2. PFAAs standard and corresponding internal standard substances and test information

| Compound | Internal<br>Standard                | Standard<br>(internal<br>standard)<br>Precursor Ion<br>(m/z) | Standard<br>(internal<br>standard)<br>Product Ion<br>(m/z) | Standard<br>(internal<br>standard) DP<br>(V) | Standard<br>(internal<br>standard) CE<br>(V) | Mark<br>recovery (%) | MDL<br>(ng·L <sup>-1</sup> ) |
|----------|-------------------------------------|--------------------------------------------------------------|------------------------------------------------------------|----------------------------------------------|----------------------------------------------|----------------------|------------------------------|
| PFBA     | <sup>13</sup> C <sub>4</sub> PFBA   | 213 (217)                                                    | 169 (172)                                                  | -40 (-50)                                    | -13 (-12)                                    | 97.49-112.02         | 0.3                          |
| PFPeA    | <sup>13</sup> C <sub>4</sub> PFBA   | 263 (217)                                                    | 219/69 (172)                                               | -40 (-50)                                    | -10/-50 (-12)                                | 73.61-112.98         | 0.2                          |
| PFHxA    | <sup>13</sup> C <sub>4</sub> PFHxA  | 313 (315)                                                    | 269/119 (270)                                              | -45 (-55)                                    | -13/-27 (-14)                                | 94.84-115.89         | 0.2                          |
| PFHpA    | <sup>13</sup> C <sub>4</sub> PFHxA  | 363 (315)                                                    | 319/169 (270)                                              | -30 (-55)                                    | -14/-24 (-14)                                | 71.74-111.84         | 0.2                          |
| PFOA     | <sup>13</sup> C <sub>4</sub> PFOA   | 413 (417)                                                    | 369/169 (372)                                              | -40 (-70)                                    | -14/-24 (-20)                                | 91.04-117.75         | 0.3                          |
| PFNA     | <sup>13</sup> C <sub>4</sub> PFNA   | 463 (468)                                                    | 419/169 (423)                                              | -35 (-70)                                    | -16/-24 (-22)                                | 92.55-112.96         | 0.2                          |
| PFDA     | <sup>13</sup> C <sub>4</sub> PFDA   | 513 (515)                                                    | 469/219 (470)                                              | -40 (-75)                                    | -18/-26 (-17)                                | 96.81-115.60         | 0.2                          |
| PFUnDA   | <sup>13</sup> C <sub>4</sub> PFUnDA | 563 (565)                                                    | 519/319 (520)                                              | -70 (-60)                                    | -16/-28 (-15)                                | 96.81-115.24         | 0.2                          |
| PFDoDA   | <sup>13</sup> C <sub>2</sub> PFDoDA | 613 (615)                                                    | 569/169 (570)                                              | -70 (-60)                                    | -18/-36 (-15)                                | 97.46-116.71         | 0.2                          |
| PFTriDA  | <sup>13</sup> C <sub>2</sub> PFDoDA | 663 (615)                                                    | 619/169 (570)                                              | -65 (-60)                                    | -20/-38 (-15)                                | 96.88-110.99         | 0.3                          |
| PFTeDA   | <sup>13</sup> C <sub>2</sub> PFDoDA | 713 (615)                                                    | 669/169 (570)                                              | -85 (-60)                                    | -20/-38 (-15)                                | 98.10-113.01         | 0.2                          |
| PFHxDA   | <sup>13</sup> C <sub>2</sub> PFDoDA | 813 (615)                                                    | 769/169 (570)                                              | -90 (-60)                                    | -18/-30 (-15)                                | 99.38-118.08         | 0.3                          |
| PFODA    | <sup>13</sup> C <sub>2</sub> PFDoDA | 913 (615)                                                    | 869/169 (570)                                              | -40 (-60)                                    | -25/-45 (-15)                                | 85.64-104.97         | 0.2                          |
| PFBS     | <sup>18</sup> O <sub>2</sub> PFHxS  | 299 (403)                                                    | 80/99 (103)                                                | -90 (-90)                                    | -70/-38 (-75)                                | 71.27-106.25         | 0.3                          |
| PFHxS    | <sup>18</sup> O <sub>2</sub> PFHxS  | 399 (403)                                                    | 80/99 (103)                                                | -90 (-90)                                    | -90/-72 (-75)                                | 89.91-102.78         | 0.3                          |
| PFOS     | <sup>13</sup> C <sub>4</sub> PFOS   | 499 (503)                                                    | 80/99 (80)                                                 | -105 (-90)                                   | -110/-98 (-95)                               | 96.42-111.07         | 0.3                          |
| PFDS     | <sup>13</sup> C <sub>4</sub> PFOS   | 599 (503)                                                    | 80/99 (80)                                                 | -120 (-90)                                   | -124/-110 (-95)                              | 97.56-109.07         | 0.2                          |

**Comment 5:** Section 2.4 – Were matrix effects evaluated?

Response: We sincerely appreciate the reviewer for raising this critical point. In this study, two field blanks and procedure blanks were included during each sampling period. Notably, the PFAA concentrations detected in both field and procedure blanks were below the MDLs. These results indicated that the influence of matrix effects exerted on experimental results was negligible, thereby proving the reliability of the experimental data.

**Comment 6:** L.174 – I suggest reporting procedure blank values of the targeted PFAS in the SI.

Response: As addressed in response to **Comment 5**, PFAA concentrations in procedure blanks were below the MDLs, and the information has been added in line 177 in this manuscript.

Line 178: **PFAAs were not detected in field blanks and program blanks.**

**Comment 7:** L.192 – The authors report a maximum average seasonal PFAA concentration of 181.63 pg/m<sup>3</sup>. However, in Fig. 1, the average concentrations of PFBA, PFOA, and PFOS exceed 200 pg/m<sup>3</sup>. Could the authors clarify this discrepancy?

Response: The data in the manuscript (46.68 – 181.63 pg·m<sup>-3</sup>) refers to the average PFAA concentrations for each season and the data in Figure 1 refers to the PFAA concentrations for the four seasons. These sentences have been rephrased in this manuscript.

Lines 193 – 201 (New Version): **The PFAA average concentrations ranged from 46.68 to 181.63 pg·m<sup>-3</sup> in Fig. 1 across four seasons. However, the increased airflow during pump operation enhanced the adsorption of gaseous PFAA on quartz filters (Turpin et al., 1994; McMurdo et al., 2008; Ahrens et al., 2012; Chang et al., 2024), which may lead to a slight overestimated of PFAA values in this study. The PFAA average concentrations were comparable to levels observed in Chengdu (150 pg·m<sup>-3</sup>) (Fang et al., 2019), but significantly higher than those recorded in Shenzhen (8.80 pg·m<sup>-3</sup>) (Liu et al., 2015a) and the average concentration in China (39.84 pg·m<sup>-3</sup>) (Han et al., 2019).**

Line 215 (New Version): **Fig. 1. Box diagram of 17 PFAA concentrations in PM<sub>2.5</sub> across four seasons.**

**Reference:**

- Fang, S., Li, C., Zhu, L., Yin, H., Yang, Y., Ye, Z., et al., 2019. Spatiotemporal distribution and isomer profiles of perfluoroalkyl acids in airborne particulate matter in Chengdu City, China. *Sci. Total. Environ.* 689, 1235-1243. <http://dx.doi.org/10.1016/j.scitotenv.2019.06.498>
- Han, D., Ma, Y., Huang, C., Zhang, X., Xu, H., Zhou, Y., et al., 2019. Occurrence and source apportionment of perfluoroalkyl acids (PFAAs) in the atmosphere in China. *Atmos. Chem. Phys.* 19, 14107-14117. <http://dx.doi.org/10.5194/acp-19-14107-2019>
- Liu, B., Zhang, H., Yao, D., Li, J., Xie, L., Wang, X., et al., 2015a. Perfluorinated compounds (PFCs) in the atmosphere of Shenzhen, China: Spatial distribution, sources and health risk assessment. *Chemos.* 138, 511-518. <http://dx.doi.org/10.1016/j.chemosphere.2015.07.012>

**Comment 8:** L.206, 210, and 221 – I assume the primary substitutes of PFOA and PFOS are the compounds mentioned in lines 204 and 205. However, this is difficult to understand. Please clearly mention which compounds are the substitutes for PFOA and PFOS.

**Response:** The substitutes of PFOA and PFOS have been added in this manuscript.

Lines 210 – 214 (New Version): **During the study period, PFOA and PFOS along with its primary substitutes (PFOA primary substitutes: PFBA and PFHxA. PFOS primary substitutes: PFPeA and PFBS.) accounted for 23%–34% and 18.1%–29.9% of total PFAAs, consistent with the research (Liu et al., 2017).**

**Reference:**

- Liu, Z., Lu, Y., Wang, P., Wang, T., Liu, S., Johnson, A.C., et al., 2017. Pollution pathways and release estimation of perfluorooctane sulfonate (PFOS) and perfluorooctanoic acid (PFOA) in central and eastern China. *Sci. Total. Environ.* 580, 1247-1256. <http://dx.doi.org/10.1016/j.scitotenv.2016.12.085>

**Comment 9:** Fig. 2- Please provide the unit in the x-axis of the second plot. Also, label the plots as 'a' and 'b'.

**Response:** The x-axis unit has been explicitly labeled in Fig. 2, with plots clearly labelled using 'a' and 'b'.



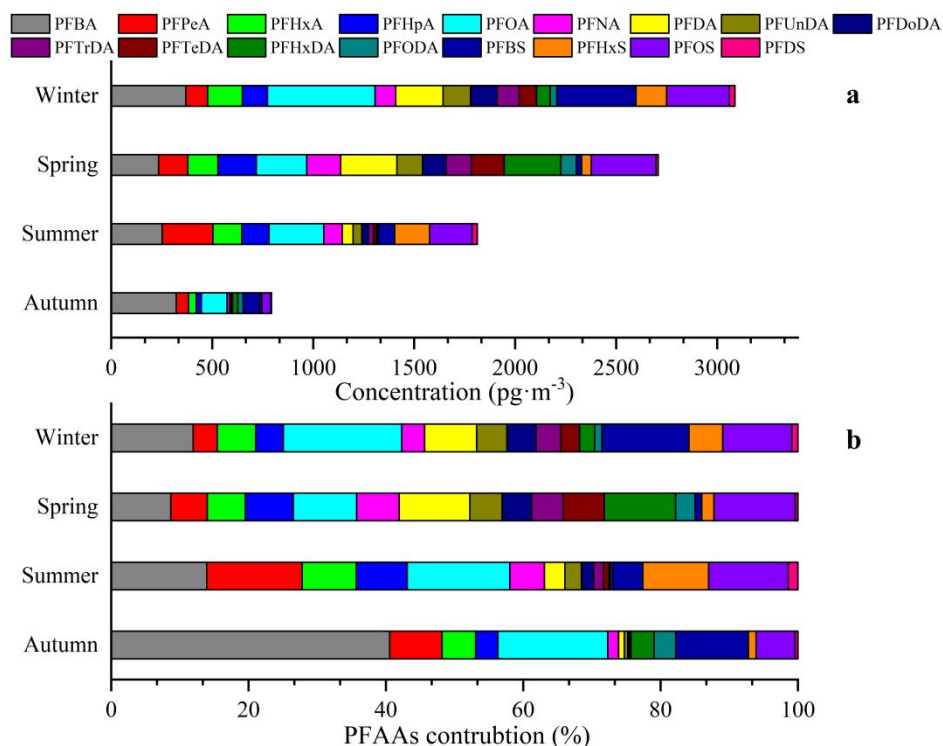

Fig. 2. PFAA concentrations characteristics across four seasons

**Comment 10:** L.237-239 – What were the different types of chemical industries near the sampling region? Were any fluorochemical manufacturing plants present within the vicinity of the sampling region?

**Response:** The chemical industrial profile of the study area primarily encompasses rubber manufacturing, fine chemicals production, pharmaceutical intermediates synthesis, and advanced materials development. These industries are also associated with emissions of fluorinated products. For example, Alchemist-pharm Chemical Technology Co., Ltd. (<http://www.alchemist-pharm.com/En>), situated 2.8 km distance from the study area, can produce fluorine-containing chemicals, and is a representative presence in the region's fluorine chemical manufacturing.

**Comment 11:** L.247-249 – This sentence is unclear. What do the concentrations (0.26–1.90  $\text{pg}/\text{m}^3$ ) in parentheses represent? Do they indicate the range of total  $\text{PM}_{2.5}$  PFAA concentrations in the Middle-Lower Yangtze River plains? Were these values measured in this study, or are they sourced from the literature? If they are from the literature, please cite the original source instead of referencing the critical review by

Faust (2023).

Response: The concentrations (0.26–1.90  $\text{pg}\cdot\text{m}^{-3}$ ) in parentheses represented PFAA concentrations in the Middle-Lower Yangtze River plains. The values sourced from the literature. The reference format has been modified.

Lines 255 – 257 (New Version): The air mass originated from Hubei Province, passed through Middle-Lower Yangtze River plains (PFAA concentrations: 0.26–1.90  $\text{pg}\cdot\text{m}^{-3}$ ) (Faust et al., 2023), and then entered the study region.

Reference:

Faust, J.A., 2023. PFAS on atmospheric aerosol particles: a review. Environ. Sci.-Process Impacts 25, 133-150. <http://dx.doi.org/10.1039/d2em00002d>

**Comment 12:** L.281-290 – Were there any wastewater treatment plants (WWTPs) in the vicinity of the study region? WWTPs are also reported to introduce PFAS into the atmosphere through aerosolisation and volatilisation during treatment processes such as aeration (please refer to the studies by Qiao et al. 2024 (<https://doi.org/10.1016/j.jhazmat.2024.134879>), Lin et al. 2022 (<https://doi.org/10.1016/j.envint.2022.107434>)).

Response: The WWTP of near the study area is Zhongyuan Environmental Protection Wulongkou Water Affairs Branch Company (distance: 7.8 km, total designed daily treatment capacity: 200,000  $\text{m}^3\text{day}^{-1}$ , <http://www.cpepgc.com/20180626/77.html>). Other WWTPs are located farther away, such as Chen Sanqiao WWTP (distance: 7.8 km, total designed daily treatment capacity: 150,000  $\text{m}^3\text{day}^{-1}$ , <https://public.zhengzhou.gov.cn/D250406X/196731.jhtml>).

**Comment 13:** 291- Please provide the correct reference.

Response: The references have been revised.

Lines 298 – 299 (New Version): This result was consistent with conclusions drawn by Chen et al. (2021) and Han et al. (2019).

Reference:

Chen, M., Wang, C., Gao, K., Wang, X., Fu, J., Gong, P., et al., 2021. Perfluoroalkyl substances in precipitation from the Tibetan Plateau during monsoon season: Concentrations, source regions and mass fluxes. Chemos. 282. <http://dx.doi.org/10.1016/j.chemosphere.2021.131105>

Han, D., Ma, Y., Huang, C., Zhang, X., Xu, H., Zhou, Y., et al., 2019. Occurrence and source apportionment of perfluoroalkyl acids (PFAAs) in the atmosphere in China. *Atmos. Chem. Phys.* 19, 14107-14117. <http://dx.doi.org/10.5194/acp-19-14107-2019>

**Comment 14:** L.312 – Could other precursor compounds such as polyfluoroalkyl phosphate esters (PAP) or perfluorooctane sulfonamides (FOSA) degrade into these compounds?

Response: PAP are a class of PFAS. These substances typically exhibit a telomer-based chemical structure (denoted as n:2 PAP, such as 6:2 and 8:2 PAP), with their primary degradation products being short-chain perfluorocarboxylic acids (PFCAs). Theoretically, PAP with longer telomeric chains (e.g., 11:2 and 12:2 PAP) could degrade into long-chain PFAAs. However, in practical applications, the industrial use of long-chain PAP ( $\geq$ C11) remains limited, and environmental studies on their behavior and fate are sparse. Current scientific literature predominantly focuses on telomer-based PAPs within the C6 – C10 chain-length range. FOSA features a fixed C8 carbon chain structure and its principal degradation end-product is PFOS.

Lines 324 – 326 (New Version): Long-chain PFAAs (C11–C14) were known degradation products of Long-chain FTOHs (Liu et al., 2017; Thackray and Selin, 2017; Wang et al., 2014).

Reference:

Liu, Z., Lu, Y., Wang, P., Wang, T., Liu, S., Johnson, A.C., et al., 2017. Pollution pathways and release estimation of perfluorooctane sulfonate (PFOS) and perfluorooctanoic acid (PFOA) in central and eastern China. *Sci. Total. Environ.* 580, 1247-1256. <http://dx.doi.org/10.1016/j.scitotenv.2016.12.085>

Thackray, C.P., Selin, N.E., 2017. Uncertainty and variability in atmospheric formation of PFCAs from fluorotelomer precursors. *Atmos. Chem. Phys.* 17, 4585-4597. <http://dx.doi.org/10.5194/acp-17-4585-2017>

Wang, Y. Q., 2014. MeteorInfo: GIS software for meteorological data visualization and analysis. *Meteorol. Appl.* 21, 360-368. <https://doi.org/10.1002/met.1345>

**Comment 15:** Fig. 5 – the caption for Figure 5(C) is missing, please include this.

Response: The caption for Figure 5(C) have been added.

Line 332 – 333 (New Version): Fig. 5. The source distribution spectrum of PFAAs in PMF (a), the annual source proportion diagram (b) and the winter source proportion diagram (c)

### Technical corrections:

**Comment 1:** L.48-49 – The phrasing of the sentence is a bit awkward. Please rephrase.

**Response:** The sentence has been rephrased.

Lines 47 – 49 (New Version): PFAs levels in the atmosphere have attracted adequate attention due to the bioaccumulation and potential toxicity of PFAs.

**Comment 2:** L.77 and 79 – please provide the in-text citation in the correct format.

**Response:** The format has been revised.

Lines 77 – 82 (New Version): Han et al. (2022) employed positive matrix factorization (PMF) to identify four sources of PFAs within the atmosphere. Meanwhile, Chen et al. (2021) and Wang et al. (2022b) combined principal component analysis with back-trajectory model to assess air mass influence PFAA concentrations in precipitation from the Tibetan Plateau and airborne particulate matter in Chengdu, China.

### Reference:

- Chen, M., Wang, C., Gao, K., Wang, X., Fu, J., Gong, P., et al., 2021. Perfluoroalkyl substances in precipitation from the Tibetan Plateau during monsoon season: Concentrations, source regions and mass fluxes. *Chemos.* 282. <http://dx.doi.org/10.1016/j.chemosphere.2021.131105>
- Han, D., Ma, Y., Huang, C., Zhang, X., Xu, H., Zhou, Y., et al., 2019. Occurrence and source apportionment of perfluoroalkyl acids (PFAs) in the atmosphere in China. *Atmos. Chem. Phys.* 19, 14107-14117. <http://dx.doi.org/10.5194/acp-19-14107-2019>
- Wang, S., Lin, X., Li, Q., Liu, C., Li, Y., Wang, X., 2022b. Neutral and ionizable per-and polyfluoroalkyl substances in the urban atmosphere: Occurrence, sources and transport. *Sci. Total. Environ.* 823. <http://dx.doi.org/10.1016/j.scitotenv.2022.153794>

**Comment 3:** L.150 – Change the word ‘extracts were’ to ‘extraction was’.

**Response:** The sentence has been revised.

Lines 151 – 153 (New Version): After the addition of methanol, the extraction was performed 3 times by sonication. Following the centrifugation (4500 r/min, 15 min), the extracts were diluted with ultrapure water.

**Comment 4:** L.156 and 163 – Supplementary section 1.2 details the source apportionment analysis. The instrument analysis is detailed in section 1.1 of the SI. Please change this.

Response: The 'Supplementary 1.2' in section 2.3 have been changed.

Lines 156 – 157 (New Version): Detailed steps for sample pretreatment are documented in Supplementary 1.1.1.

Lines 163 – 164 (New Version): Comprehensive details regarding the instrumental analysis can be found in Supplementary 1.1.2.

**Comment 5:** L.41 of SI – The 'Evaporationoff' seems to be a typo. Please correct this.

Response: The word has been revised in this supplementary.

Lines 40 – 42 (New Version): Nitrogen Evaporation was performed using a nitrogen evaporator to completely dry the eluate (the nitrogen blow temperature should not exceed 40°C, and no bubbles should be present on the liquid surface).
